# Supplementary material for: Prognosis and Novel Drug Targets for Key lncRNAs of Epigenetic Modification in Colorectal Cancer
Source: Hindawi journal article supplement (doi:10.1155/2023/6632205), 2023-04-12

A

|            | pvalue | Hazard ratio        |
|------------|--------|---------------------|
| AC093157.1 | 0.008  | 0.467(0.266-0.818)  |
| LINC00513  | 0.004  | 0.683(0.529-0.883)  |
| AP002336.2 | 0.006  | 0.520(0.327-0.827)  |
| AC012313.5 | 0.005  | 0.331(0.152-0.717)  |
| AC011815.1 | 0.005  | 0.391(0.201-0.758)  |
| AC008121.2 | 0.007  | 0.359(0.170-0.761)  |
| AC025171.4 | 0.007  | 1.798(1.170-2.761)  |
| AC090948.2 | 0.006  | 0.526(0.331-0.836)  |
| ZEB1-AS1   | <0.001 | 2.503(1.615-3.881)  |
| AC109449.1 | 0.004  | 2.987(1.410-6.326)  |
| AC009041.3 | 0.007  | 0.606(0.420-0.872)  |
| LINC02516  | 0.002  | 0.002(0.000-0.100)  |
| PCAT1      | 0.008  | 0.452(0.251-0.815)  |
| AC011997.1 | <0.001 | 5.465(2.212-13.500) |

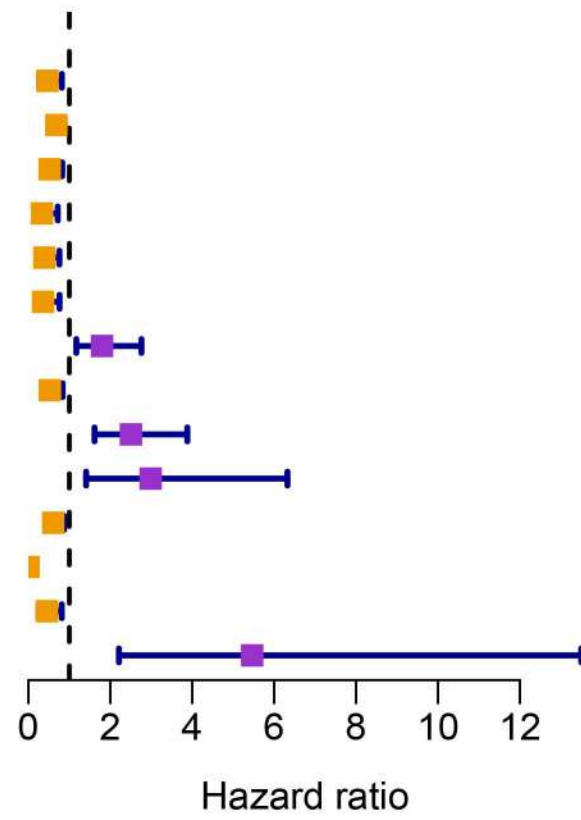

B

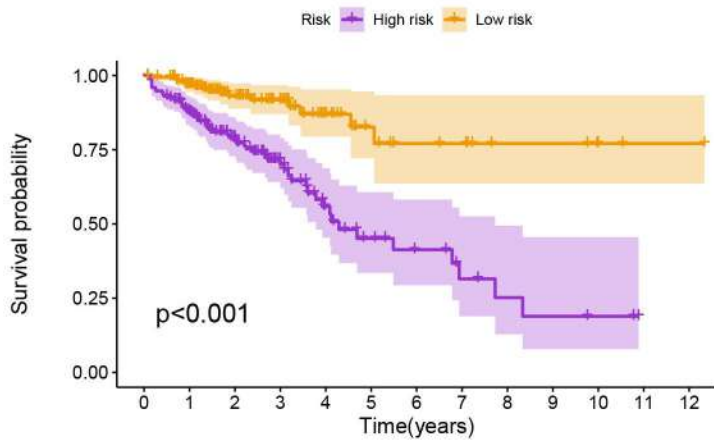

| Risk | High risk | Low risk |
|------|-----------|----------|
| 0    | 177       | 178      |
| 1    | 139       | 154      |
| 2    | 85        | 92       |
| 3    | 41        | 56       |
| 4    | 22        | 27       |
| 5    | 14        | 15       |
| 6    | 10        | 11       |
| 7    | 6         | 9        |
| 8    | 4         | 5        |
| 9    | 3         | 5        |
| 10   | 2         | 2        |
| 11   | 0         | 1        |
| 12   | 0         | 1        |

C

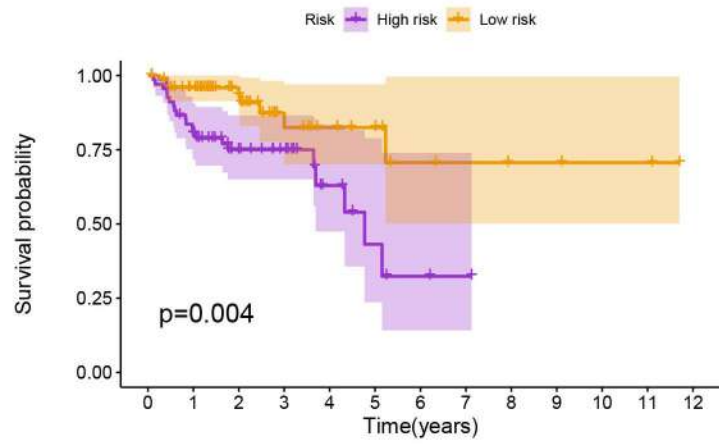

| Risk | High risk | Low risk |
|------|-----------|----------|
| 0    | 73        | 75       |
| 1    | 52        | 64       |
| 2    | 35        | 39       |
| 3    | 21        | 18       |
| 4    | 8         | 11       |
| 5    | 4         | 9        |
| 6    | 2         | 5        |
| 7    | 1         | 4        |
| 8    | 0         | 3        |
| 9    | 0         | 3        |
| 10   | 0         | 2        |
| 11   | 0         | 2        |
| 12   | 0         | 0        |

D

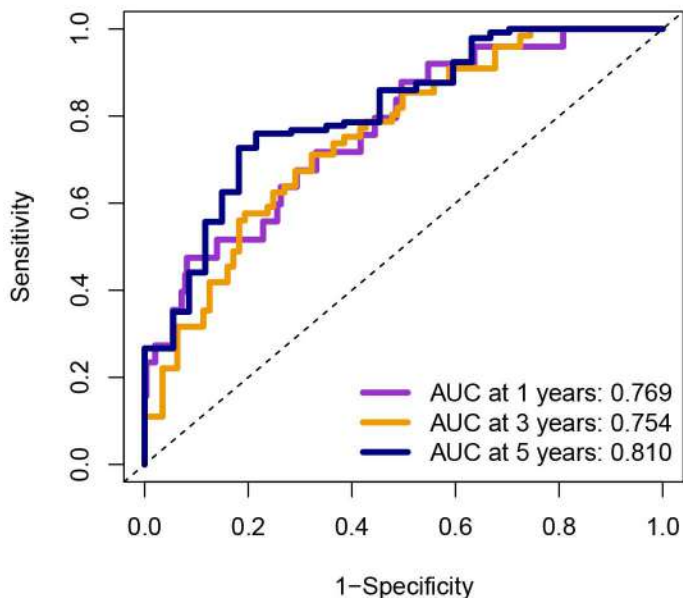

E

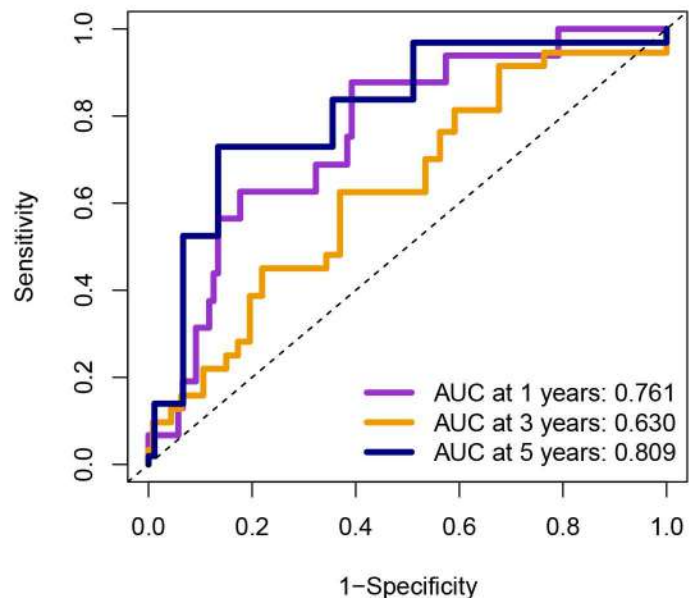

Supplement: f1 [file 6632205.f1.pdf]
